# Supplementary material
Source: publisher figshare collection journal article supplement (https://springernature.figshare.com/ndownloader/files/13875782)
Supplement: Supplementary file [file 13875782]

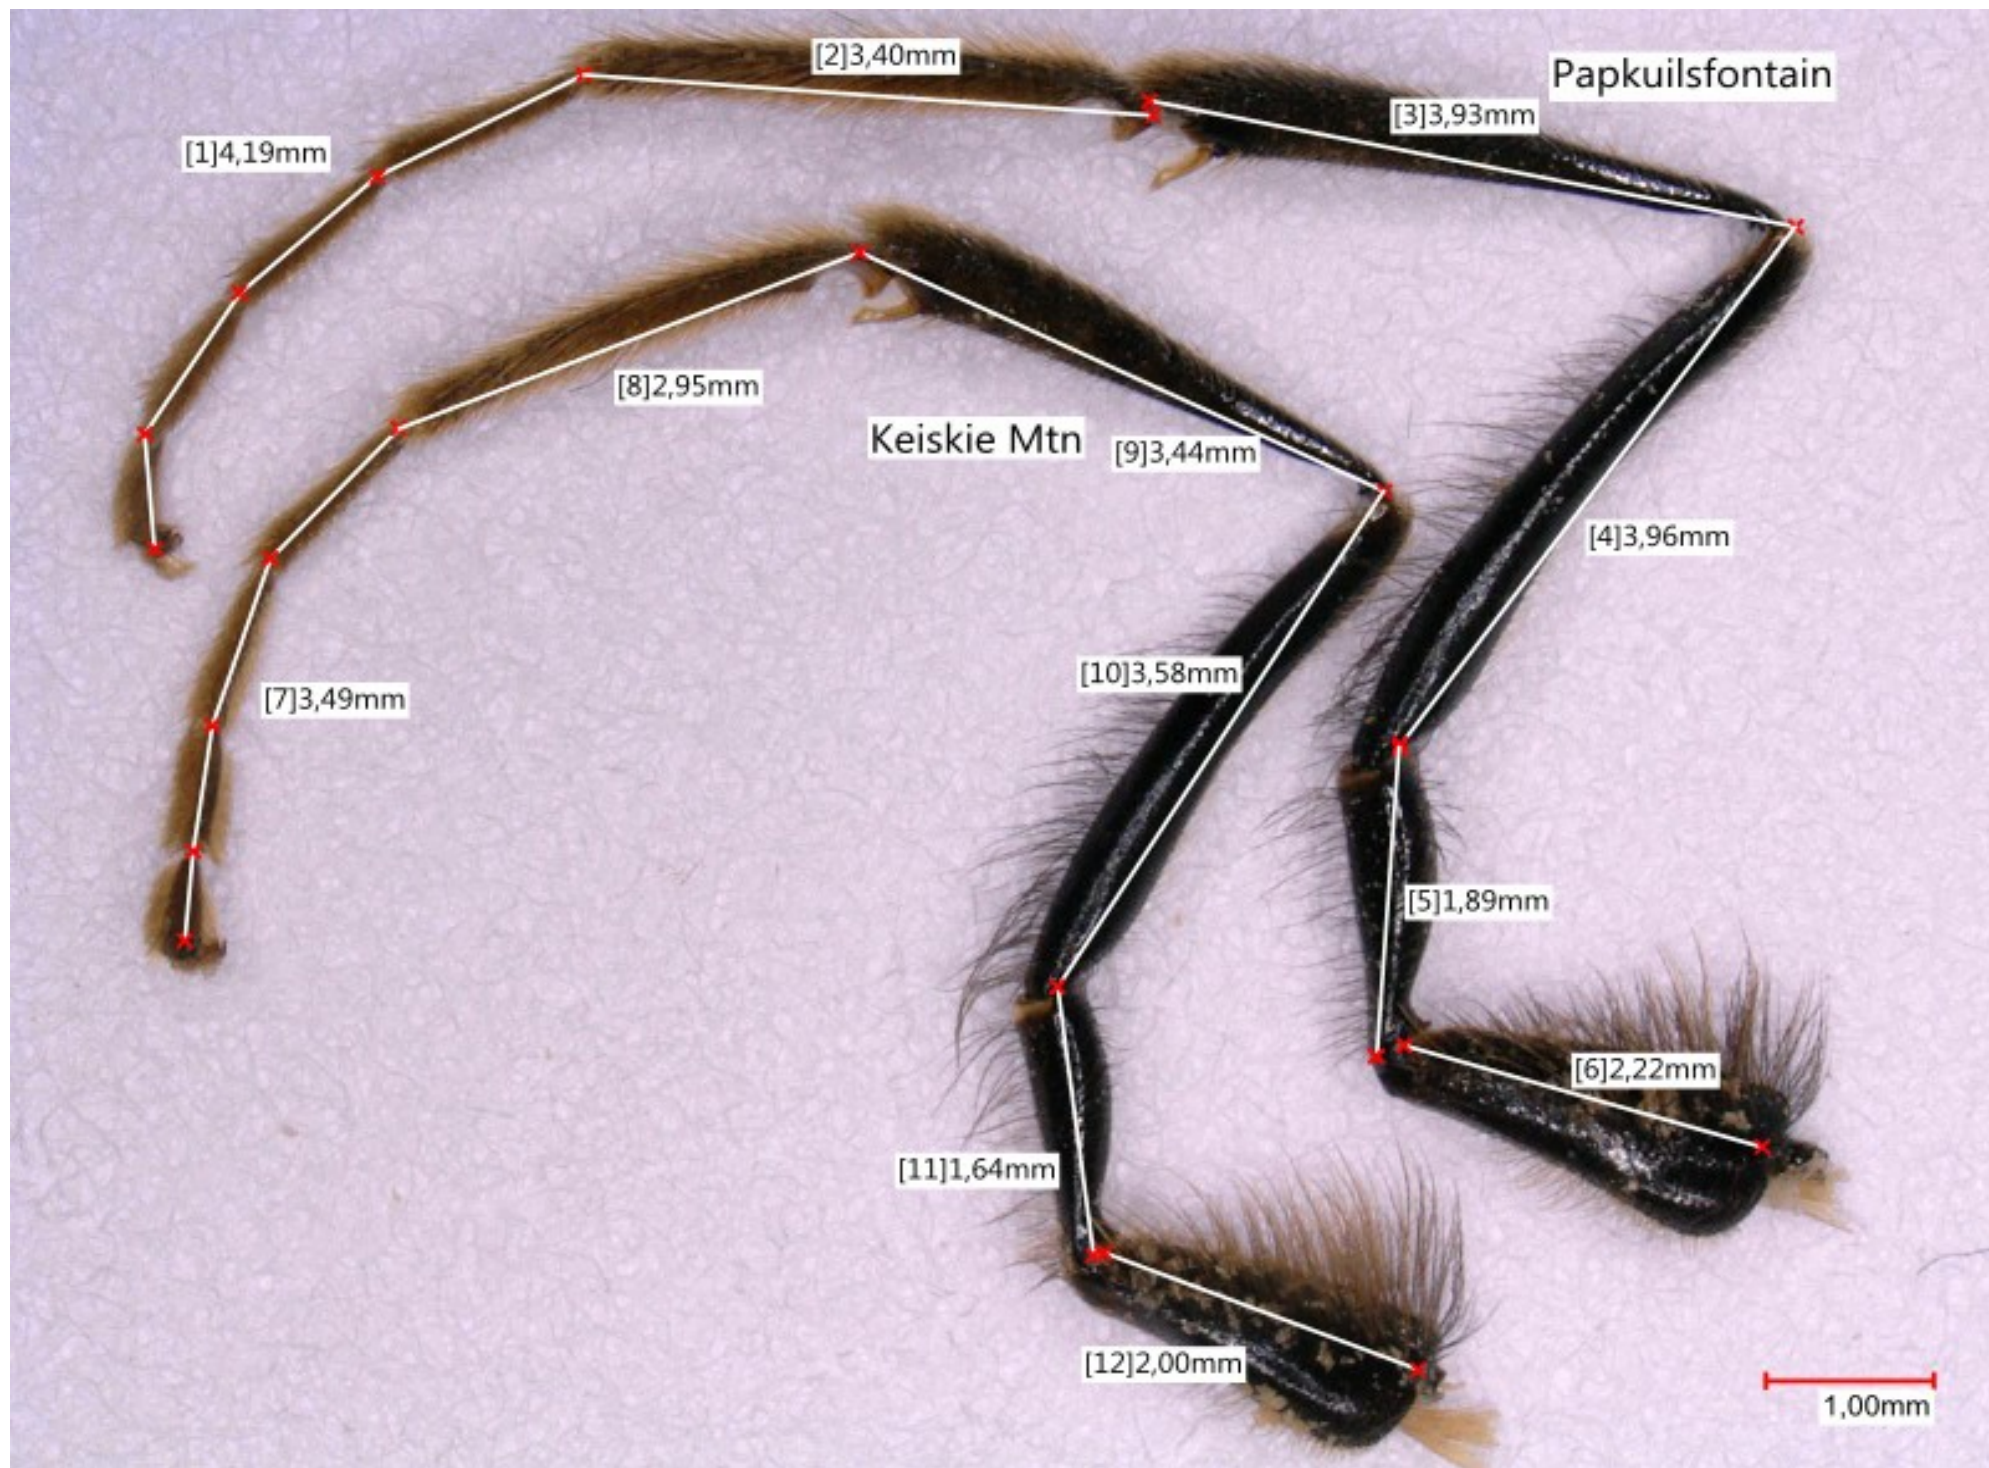

**Additional file 2:** Picture showing the differences in FLL between *population pool* LC (Keiskie Mountains) and LF (Farm Papkuilsfontain)
